# Supplementary figures and images for: The <em>Sinorhizobium Meliloti</em> Nsps-Mbaa System affects Biofilm Formation, Exopolysaccharide Production and Motility in Response to Specific Polyamines
Source: Preprints.org preprint supplement (doi:10.20944/preprints202207.0204.v1), 2022-07-14

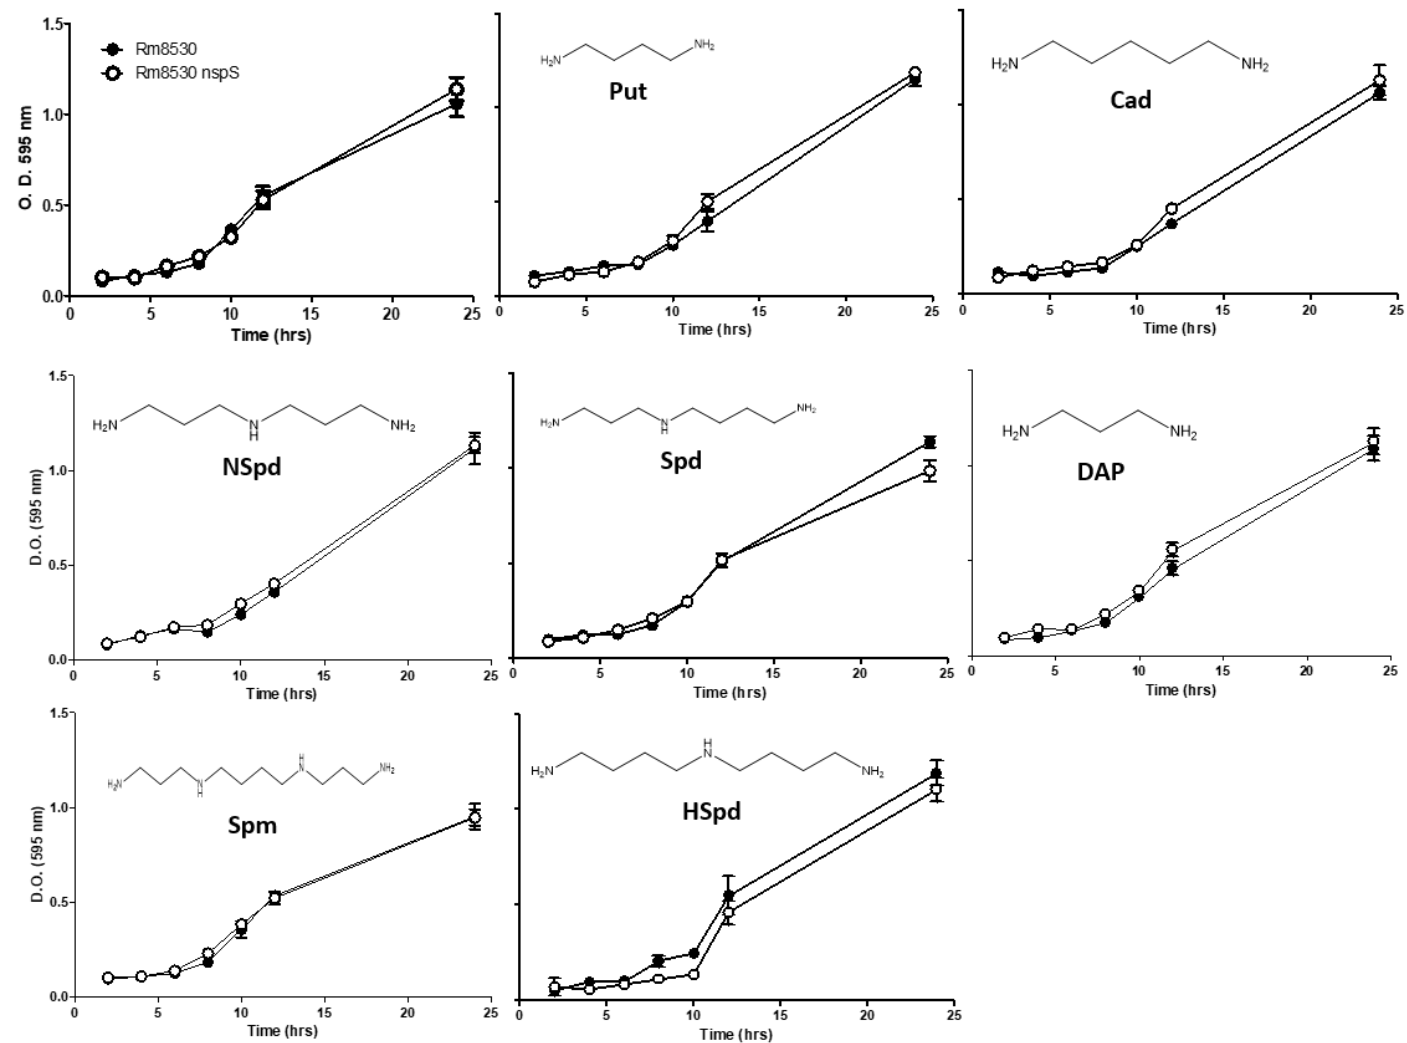

Supplement: Supplementary file 1 [file supplementary]

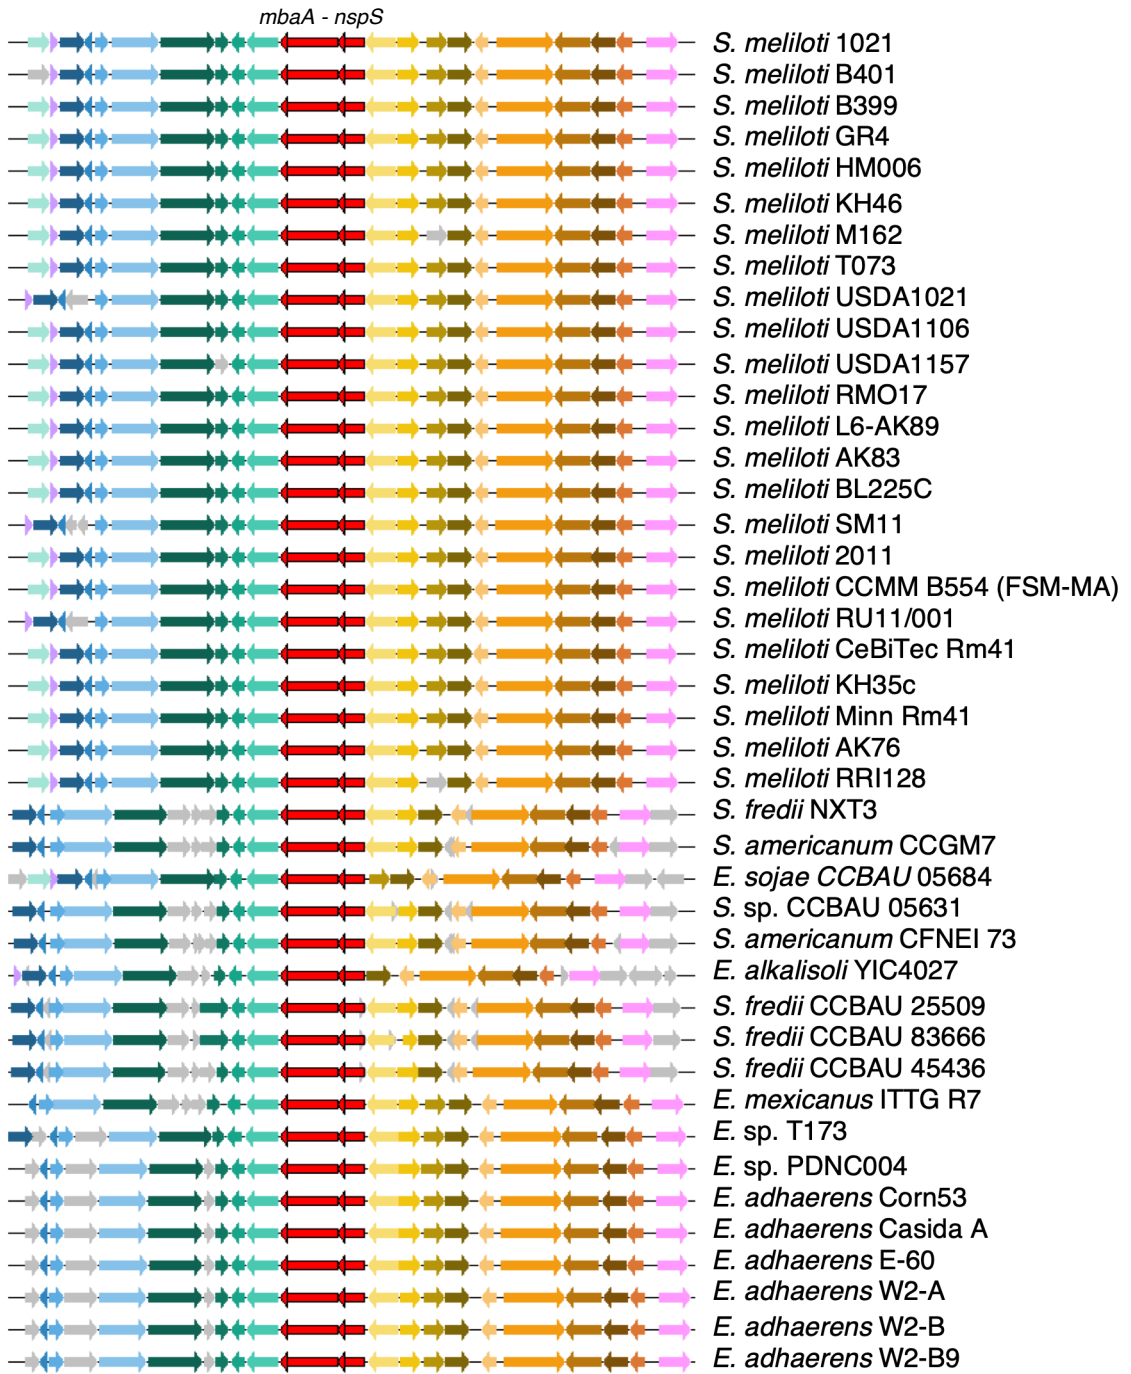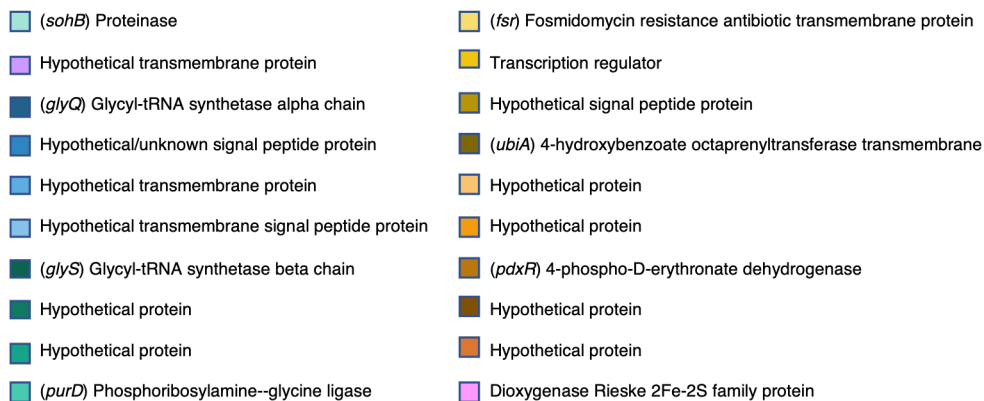

Supplement: Supplementary file 3 [file supplementary]

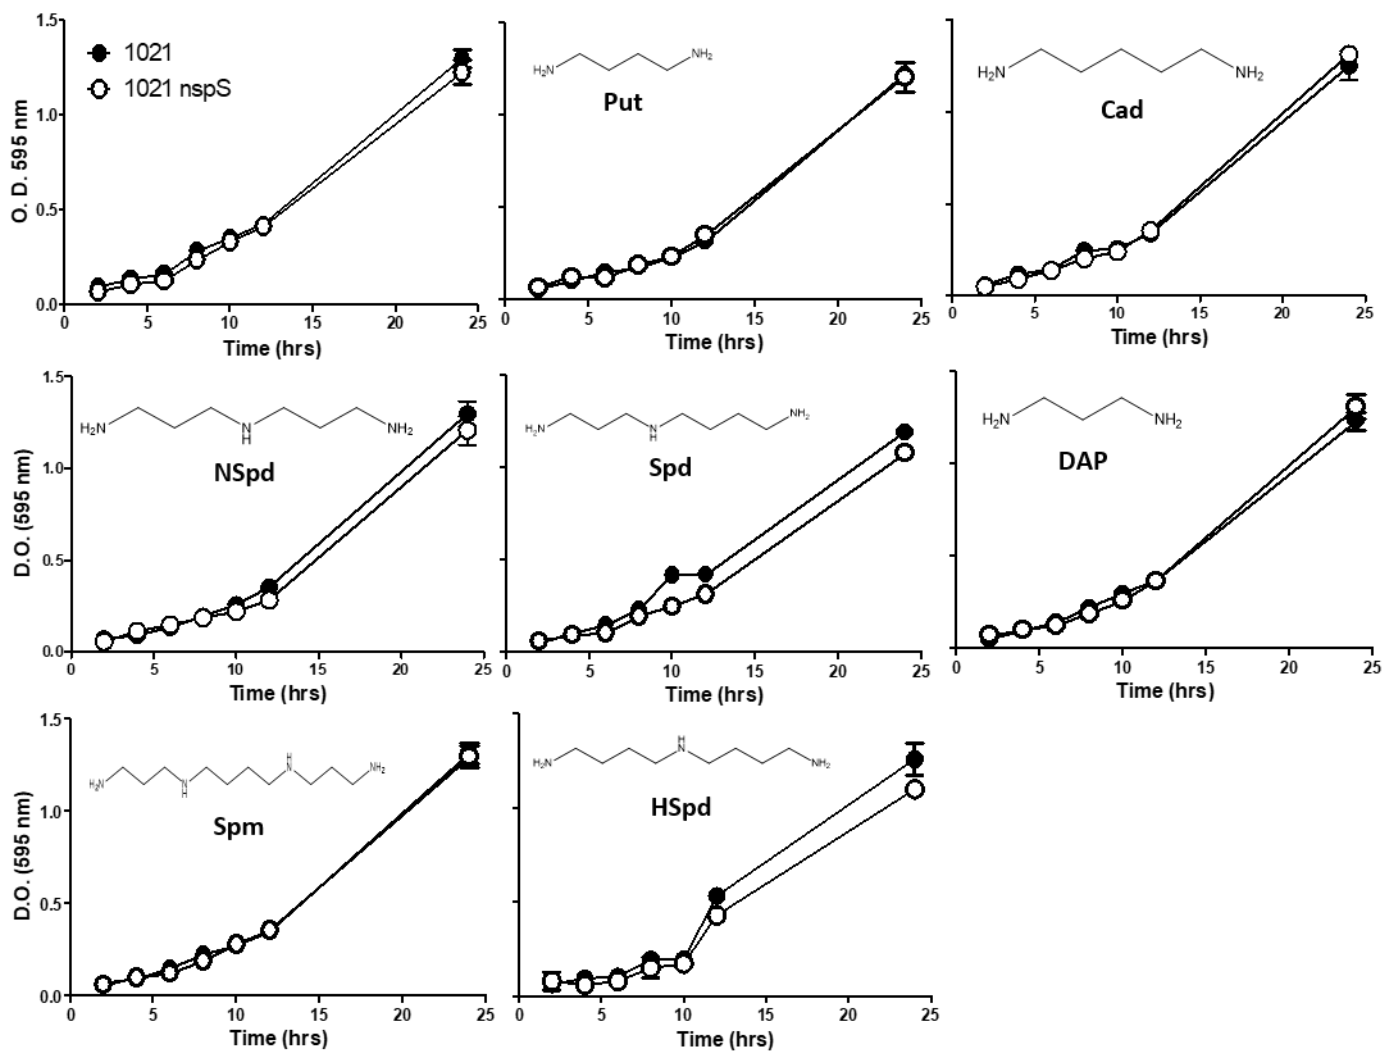

Supplement: Supplementary file 6 [file supplementary]
